# Supplementary material for: Comparison of Rumen and Manure Microbiomes and Implications for the Inoculation of Anaerobic Digesters
Source: MDPI journal article supplement (doi:10.3390/microorganisms6010015), 2018-02-14
Supplement: s1 [file s1]

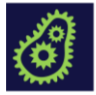

Supplementary Material

# Comparison of rumen and manure microbiomes and implications for the inoculation of anaerobic digesters

Emine Gozde Ozbayram<sup>1,3</sup>, Orhan Ince<sup>1</sup>, Bahar Ince<sup>2</sup>, Hauke Harms<sup>3</sup>, Sabine Kleinsteuber<sup>3,\*</sup>

<sup>1</sup> Department of Environmental Engineering, Faculty of Civil Engineering, Istanbul Technical University, Maslak, 34469 Istanbul, Turkey; gozbayram@itu.edu.tr, inceor@itu.edu.tr

<sup>2</sup> Institute of Environmental Sciences, Boğaziçi University, Bebek, 34342 Istanbul, Turkey; bahar.ince@boun.edu.tr

<sup>3</sup> Department of Environmental Microbiology, Helmholtz Centre for Environmental Research - UFZ, 04318 Leipzig, Germany; hauke.harms@ufz.de, sabine.kleinsteuber@ufz.de

\* Correspondence: sabine.kleinsteuber@ufz.de; Tel.: +49-341-235-1325

## Supplementary Figures:

**Figure S1.** Krona charts illustrating the bacterial community composition of (a) the rumen samples and (b) the manure samples from three individuals on phylum, class, order and family levels.

**Figure S2.** Krona charts illustrating the methanogenic community composition of (a) the rumen samples and (b) the manure samples from three individuals on phylum, class, order and family levels.

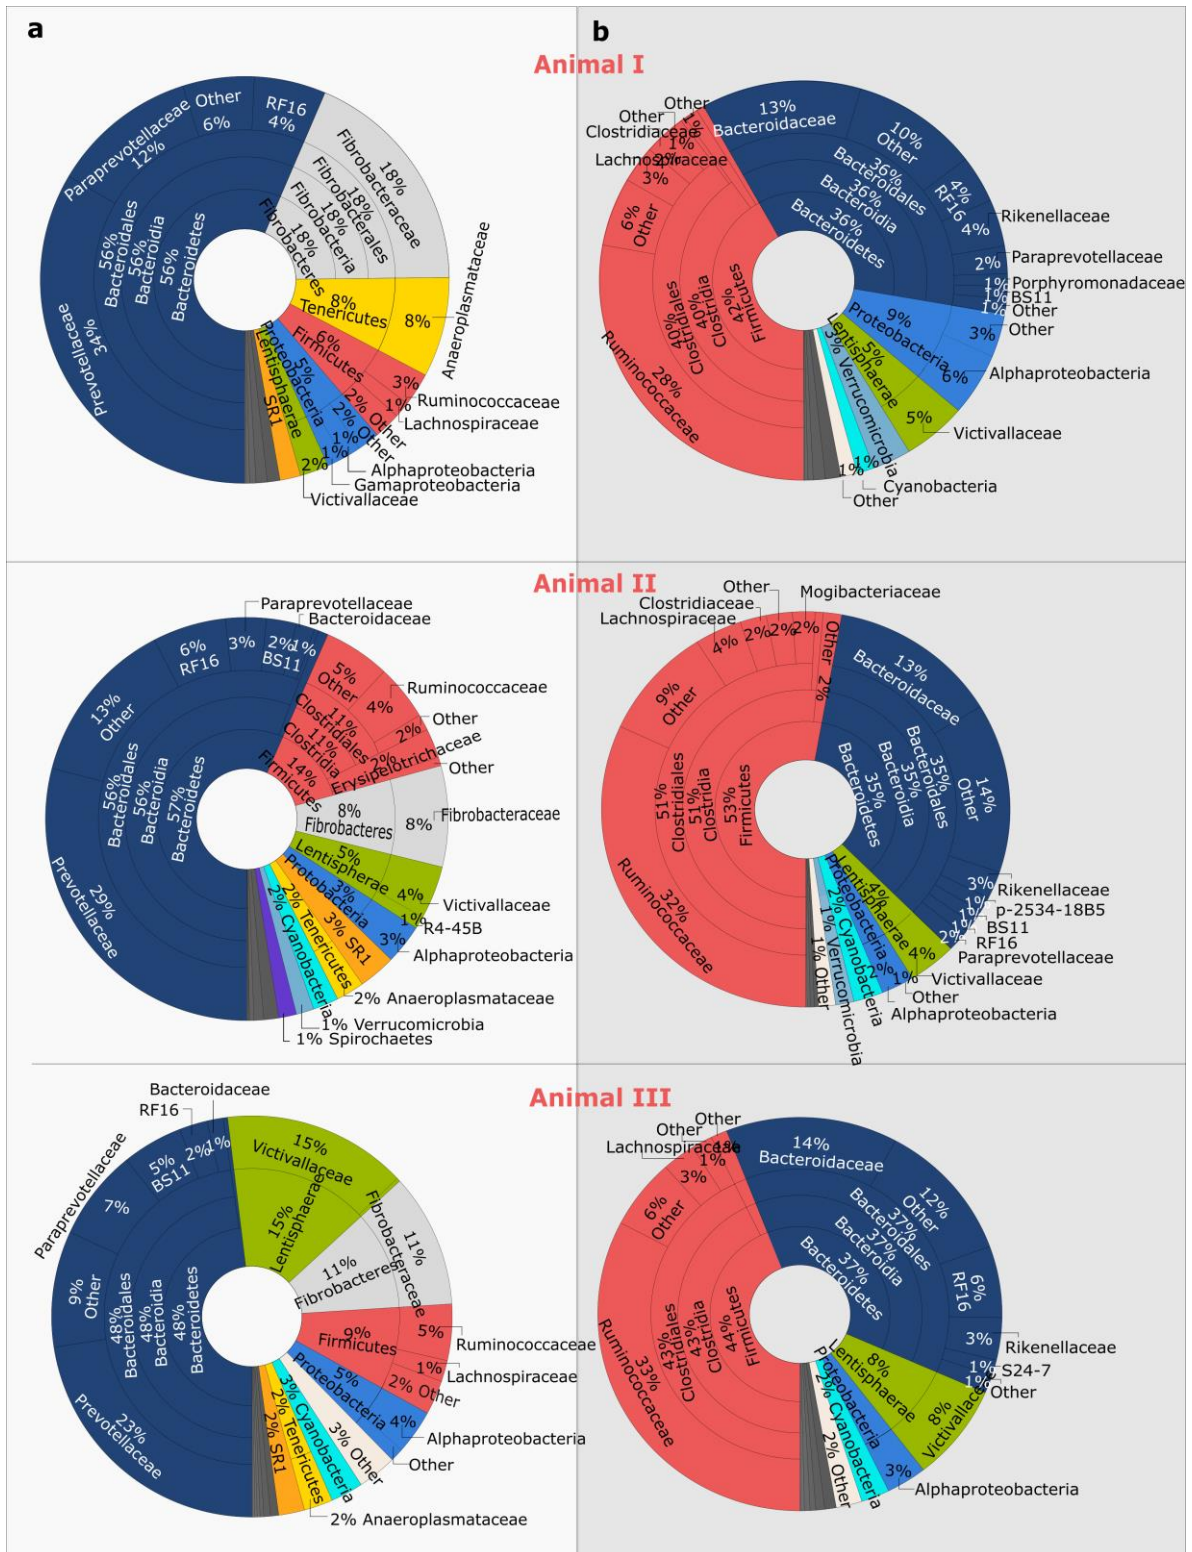

**Figure S1.** Krona charts illustrating the bacterial community composition of (a) the rumen samples and (b) the manure samples from three individuals on phylum, class, order and family levels.

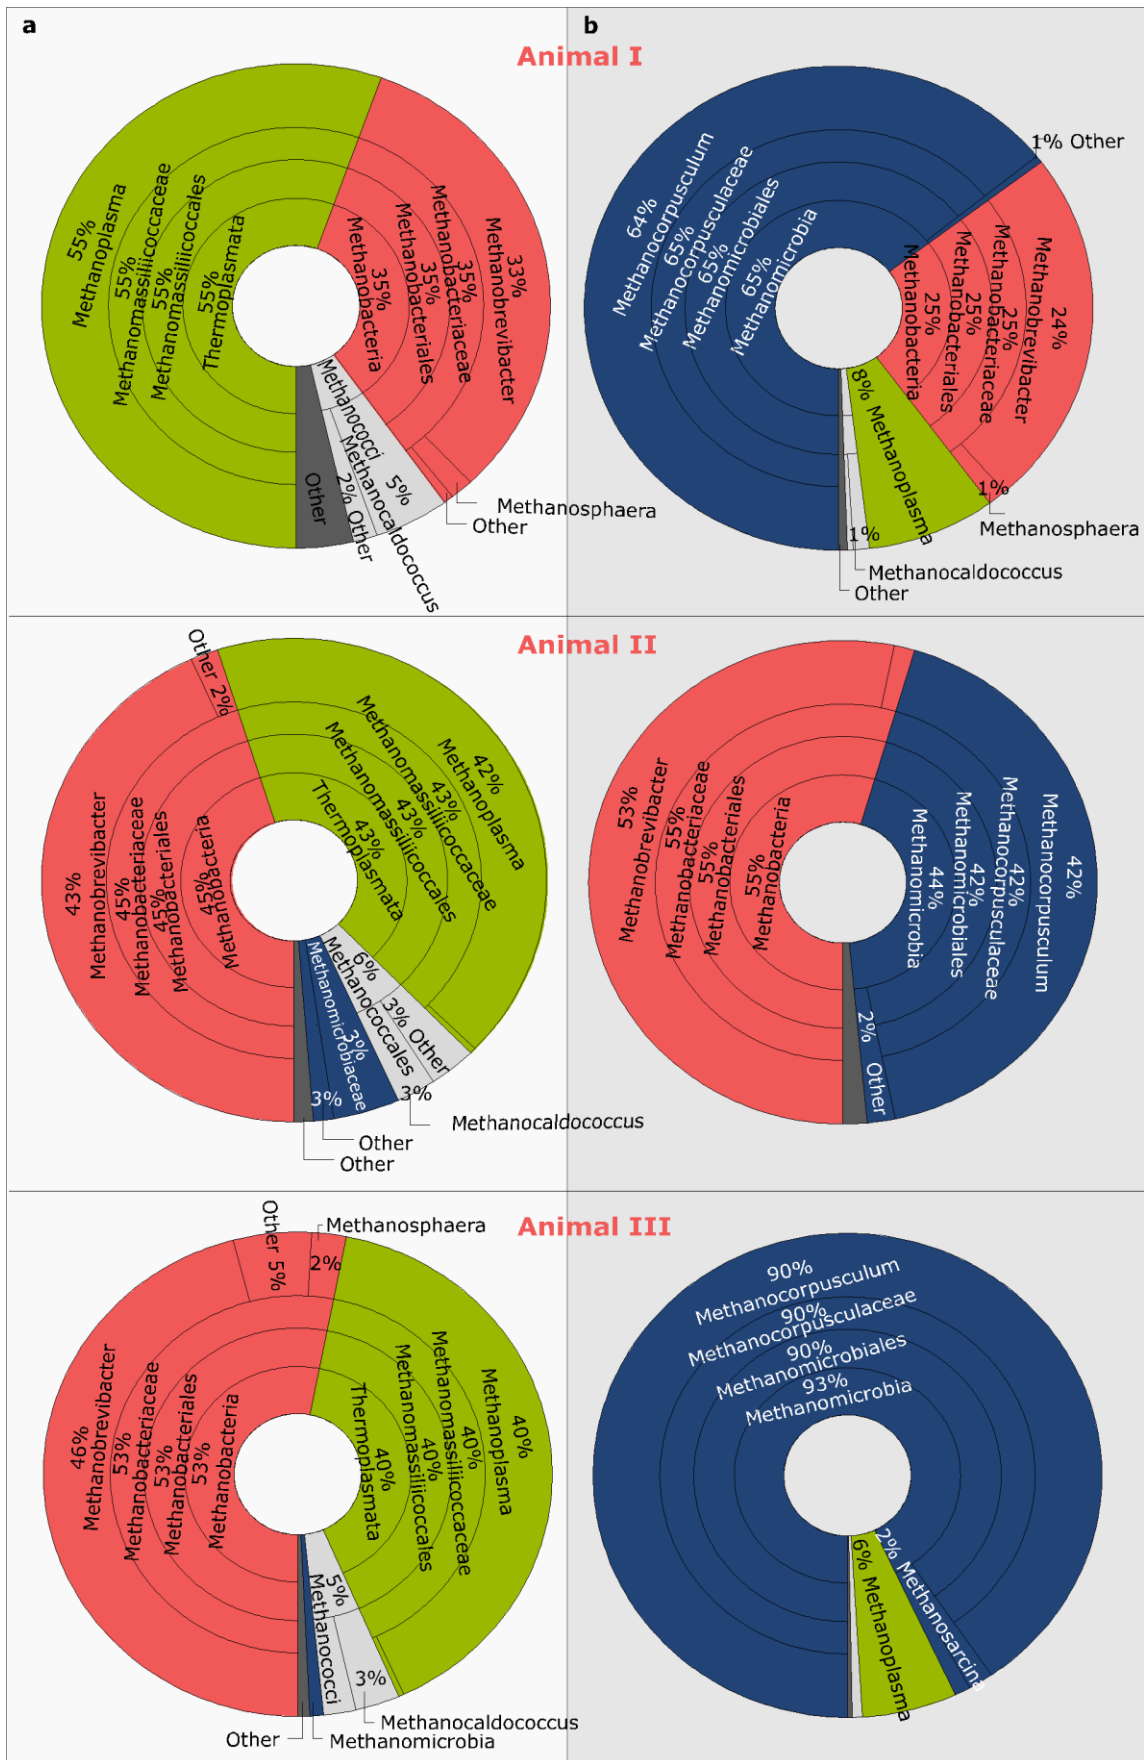

**Figure S2.** Krona charts illustrating the methanogenic community composition of (a) the rumen samples and (b) the manure samples from three individuals on phylum, class, order and family levels.
